# Supplementary material
Source: HighWire-hosted journal article supplement (http://canjsurg.ca/highwire/filestream/96836/field_highwire_adjunct_files/0/cjs-011517-1-at.pdf)
Supplement: cjs-011517-1-at.pdf [file cjs-011517-1-at.pdf]

**Appendix 1** to Patel SV, Nanji S, Brogly SB, et al. High complication risk among patients undergoing appendectomy in Ontario: a population-based retrospective cohort study. *Can J Surg* 2018.

DOI: 10.1503/cjs.011517

Copyright © 2018 The Author(s) or their employer(s).

To receive this resource in an accessible format, please contact us at [cmajgroup@cmaj.ca](mailto:cmajgroup@cmaj.ca).

*Online appendices are unedited and posted as supplied by the authors.*

**Table A-1: Complication diagnostic codes**

| OHIP Diagnostic Code | Description                                                                                              | Complication Type |
|----------------------|----------------------------------------------------------------------------------------------------------|-------------------|
| 410                  | Acute myocardial infarction                                                                              | Cardiac           |
| 413                  | Acute coronary insufficiency, angina pectoris, acute ischaemic heart disease                             | Cardiac           |
| 427                  | Paroxysmal tachycardia, atrial or ventricular flutter or fibrillation, cardiac arrest, other arrhythmias | Cardiac           |
| 428                  | Congestive heart failure                                                                                 | Cardiac           |
| 785                  | Chest pain, tachycardia, syncope, shock, edema, masses                                                   | Cardiac           |
| 560                  | Intestinal obstruction, intussusception, paralytic ileus, volvulus, impaction of intestine               | Ileus/SBO         |
| 038                  | Septicemia, blood poisoning                                                                              | Infectious        |
| 432                  | Intracranial Haemorrhage                                                                                 | Neurologic        |
| 435                  | Transient cerebral ischaemia                                                                             | Neurologic        |
| 436                  | Acute cerebrovascular accident, C.V.A., stroke                                                           | Neurologic        |
| 009                  | Diarrhea, gastro-enteritis, viral gastro-enteritis                                                       | Other             |
| 287                  | Purpura, thrombocytopenia, other hemorrhagic conditions                                                  | Other             |
| 451                  | Phlebitis, thrombophlebitis                                                                              | Other             |
| 460                  | Acute nasopharyngitis, common cold                                                                       | Other             |
| 788                  | Renal colic, urinary retention, nocturia, masses                                                         | Other             |
| 879                  | Lacerations, open wounds - except limbs                                                                  | Other             |
| 415                  | Pulmonary embolism, pulmonary infarction                                                                 | PE/DVT            |
| 486                  | Pneumonia - all types                                                                                    | Pneumonia         |
| 487                  | Influenza                                                                                                | Pneumonia         |

**Appendix 1** to Patel SV, Nanji S, Brogly SB, et al. High complication risk among patients undergoing appendectomy in Ontario: a population-based retrospective cohort study. *Can J Surg* 2018.  
DOI: 10.1503/cjs.011517

*Online appendices are unedited and posted as supplied by the authors.*

|     |                                                                                                   |                         |
|-----|---------------------------------------------------------------------------------------------------|-------------------------|
| 512 | Spontaneous pneumothorax, tension pneumothorax                                                    | Respiratory             |
| 518 | Atelectasis, other diseases of lung                                                               | Respiratory             |
| 519 | Other diseases of respiratory system                                                              | Respiratory             |
| 769 | Hyaline membrane disease, respiratory distress syndrome                                           | Respiratory             |
| 786 | Epistaxis, hemoptysis, cough, dyspnea, masses, shortness of breath, hyperventilation, sleep apnea | Respiratory             |
| 682 | Cellulitis, abscess                                                                               | Surgical Site Infection |
| 685 | Pilonidal cyst or abscess                                                                         | Surgical Site Infection |
| 998 | Of surgical and medical care (e.g., wound infection, wound disruption, other iatrogenic disease)  | Surgical Site Infection |
| 595 | Cystitis                                                                                          | UTI                     |
| 599 | Other disorders of urinary tract                                                                  | UTI                     |
